# Supplementary material for: Free-energy relationships for the interactions of tryptophan with phosphocholines
Source: Royal Society of Chemistry journal article supplement (doi:10.1039/b913919b), 2009-01-01
Supplement: b913919b.pdf [file b913919b.pdf]

# **Free-Energy Relationships for the Interactions of Tryptophan with Phosphocholines**

**Georg Blaser,<sup>a</sup> John M. Sanderson\*<sup>a</sup> and Mark R. Wilson<sup>a</sup>**

## Supplementary Information

Contents (click to jump to the corresponding section)

|                                                                                              |     |
|----------------------------------------------------------------------------------------------|-----|
| 1. <a href="#">Equations used in curve fitting</a>                                           | S3  |
| 2. <a href="#">Competitive binding data</a>                                                  | S7  |
| 3. <a href="#">Chemical shift changes for the indole NH</a>                                  | S8  |
| 4. <a href="#">Correlations with Resonance and Inductive Components of Hammett Parameter</a> | S9  |
| 5. <a href="#">Dynamics trajectories</a>                                                     | S10 |
| 6. <a href="#">Torsional distributions</a>                                                   | S11 |
| 7. <a href="#">Radial distribution functions</a>                                             | S15 |
| 8. <a href="#">Clustered structures</a>                                                      | S16 |
| 9. <a href="#">1:2 Lipid:Tryptophan Simulation Data</a>                                      | S17 |
| 10. <a href="#">1:2 Lipid:Tryptophan Simulation - Clustering</a>                             | S19 |

## 1. Equations Used for Curve Fitting

### 1.1 Equilibrium Constants

$$K_m = \frac{[L_m]}{[L]^n} \quad (S1) \quad K_{1wl} = \frac{[WL]}{[W][L]} \quad (S2) \quad K_{2wl} = \frac{[W_2L]}{[WL][W]} \quad (S3) \quad K_1 = \frac{[LT]}{[L][T]} \quad (S4) \quad K_2 = \frac{[LT_2]}{[LT][T]} \quad (S5)$$

$$K_{1w} = \frac{[WLT]}{[W][LT]} \quad (S6) \quad K_1' = \frac{[WLT]}{[WL][T]} \quad (S7)$$

where:

$[L_m]$  is the concentration of lipid in micellar form (*NOT the concentration of micelles*)

$[L]$  is the concentration of free lipid

$[WL]$  is the concentration of 1:1 water:lipid complex

$[W]$  is the concentration of free water

$[W_2L]$  is the concentration of 2:1 water:lipid complex

$[LT]$  is the concentration of 1:1 lipid:tryptophan complex

$[T]$  is the concentration of free tryptophan

$[LT_2]$  is the concentration of 1:2 lipid:tryptophan complex

$[WLT]$  is the concentration of 1:1:1 water:lipid:tryptophan complex

$K_m$  is the equilibrium constant for micelle formation

$K_{1wl}$  is the equilibrium constant for formation of the 1:1 water:lipid complex

$K_{2wl}$  is the equilibrium constant for formation of the 2:1 water:lipid complex

$K_1$  is the equilibrium constant for formation of the 1:1 lipid:tryptophan complex

$K_2$  is the equilibrium constant for formation of the 1:2 lipid:tryptophan complex

$K_{1w}$  is the equilibrium constant for formation of the 1:1:1 water:lipid:tryptophan complex from the 1:1 lipid:tryptophan complex and water

$K_1'$  is the equilibrium constant for formation of the 1:1:1 water:lipid:tryptophan complex from the 1:1 water:lipid complex and tryptophan

### 1.2 Equations for Water/Lipid (DMPC) Titrations

#### 1.2.1 Binding Isotherms

$$\delta_w = \frac{[WL](\delta_{1wl} - \delta_{fw})}{[W]_t} + \frac{2[W_2L](\delta_{2wl} - \delta_{fw})}{[W]_t} + \delta_{fw} \quad (S8)$$

$$\delta_l = \frac{[WL](\delta_{1wl} - \delta_{fl})}{[L]_t} + \frac{[W_2L](\delta_{2wl} - \delta_{fl})}{[L]_t} + \frac{[L_m](\delta_{lm} - \delta_{fl})}{[L]_t} + \delta_{fl} \quad (S9)$$

where:

$[L]_t$  is the total concentration of lipid

$[W]_t$  is the concentration of water

$\delta_w$  is the calculated water chemical shift

$\delta_{fw}$  is the chemical shift of free water

$\delta_{1wl}$  is the water chemical shift in the 1:1 water:lipid complex

$\delta_{2wl}$  is the water chemical shift in the 2:1 water:lipid complex

$\delta_l$  is the calculated lipid chemical shift

$\delta_{fl}$  is the chemical shift of free DMPC

$\delta_{1wl}$  is the DMPC chemical shift in the 1:1 water:lipid complex

$\delta_{2wl}$  is the DMPC chemical shift in the 2:1 water:lipid complex

$\delta_{lm}$  is the DMPC chemical shift in micellar aggregates

#### 1.2.2 Mass Balances

$$[L]_t = [L] + [WL] + [W_2L] + [L_m] \quad (S10) \quad \{\text{used to calculate } [L_m]\}$$

$$[W]_t = [W] + [WL] + 2[W_2L] \quad (S11) \quad \{\text{used to calculate } [W]\}$$

### 1.2.3 Speciation

#### [L]

$$[L] = \frac{-b_L - \sqrt{b_L^2 - 4K_m^2([L]_t - [WL] - [W_2L])^2}}{2K_m^2([L]_t - [WL] - [W_2L])} \quad (S12)$$

where:

$$-b_L = 1 + 2K_m\{[L]_t - [WL] - [W_2L]\} \quad (S13)$$

#### [WL]

$$[WL] = \frac{-b_{WL} - \sqrt{b_{WL}^2 - 4y^2K_{1wl}^2([W]_t - 2[W_2L])([L]_t - [W_2L])}}{2yK_{1wl}} \quad (S14)$$

where:

$$-b_{WL} = 1 + yK_{1wl}\{[L]_t - 3[W_2L] + [W]_t\} \quad (S15)$$

$$y = 1 + K_m^2[L]^2 - 2K_m[L] \quad (S16)$$

#### [W<sub>2</sub>L]

$$[W_2L] = \frac{-b_{W_2L} - \sqrt{b_{W_2L}^2 - 16K_{2wl}^2([W]_t - [W])([W]_t - [WL])}}{8K_{2wl}} \quad (S17)$$

where:

$$-b_{W_2L} = 1 + 2K_{2wl}\{2[W]_t - [W] - [WL]\} \quad (S18)$$

## 1.3 Equations for Tryptophan/Lipid (DMPC) Titrations

### 1.3.1 Tryptophan Binding Isotherm

$$\delta = \frac{K_1[L](\delta_1 - \delta_f) + K_1[WL](\delta_1 - \delta_f) + 2K_2[LT](\delta_2 - \delta_f)}{1 + K_1[L] + K_1[WL] + 2K_2[LT]} + \delta_f \quad (S19)$$

where:

$\delta$  is the calculated chemical shift

$\delta_f$  is the chemical shift of free tryptophan

$\delta_1$  is the tryptophan chemical shift in the 1:1 lipid:tryptophan complex

$\delta_2$  is the tryptophan chemical shift in the 1:2 lipid:tryptophan complex

$\delta_1$  is the tryptophan chemical shift in the 1:1:1 water:lipid:tryptophan complex

### 1.3.2 Water Binding Isotherm

$$\delta_w = \frac{[WLT](\delta_{1w} - \delta_{fw})}{[W]_t} + \frac{[WL](\delta_{1wl} - \delta_{fw})}{[W]_t} + \frac{2[W_2L](\delta_{2wl} - \delta_{fw})}{[W]_t} + \delta_{fw} \quad (S20)$$

where:

$\delta_{1w}$  is the water chemical shift in the 1:1:1 water:lipid:tryptophan complex

### 1.3.3 Mass Balances

$$[L]_t = [L] + [WL] + [W_2L] + [L_m] + [WLT] + [LT] + [LT_2] \quad (S21) \quad \{\text{used to calculate } [L_m]\}$$

$$[W]_t = [W] + [WL] + 2[W_2L] + [WLT] \quad (S22) \quad \{\text{used to calculate } [W]\}$$

$$[T]_t = [T] + [WLT] + [LT] + 2[LT_2] \quad (S23) \quad \{\text{used to calculate } [T]\}$$

where:

$[T]_t$  is the total tryptophan concentration

### 1.3.4 Speciation

**[L]**

$$[L] = \frac{-b_L - \sqrt{b_L^2 - 4K_m^2([L]_t - [WL] - [WLT] - [W_2L] - [LT] - [LT_2])^2}}{2K_m^2([L]_t - [WL] - [WLT] - [W_2L] - [LT] - [LT_2])} \quad (S24)$$

where:

$$-b_L = 1 + 2K_m\{[L]_t - [WL] - [WLT] - [W_2L] - [LT] - [LT_2]\} \quad (S25)$$

**[LT]**

$$[LT] = \frac{-b_{LT} - \sqrt{b_{LT}^2 - 4K_1^2([T]_t - 2[LT_2] - [WLT])([L]_t - [WL] - [WLT] - [LT_2] - [W_2L] - x)}}{2K_1} \quad (S26)$$

where:

$$-b_{LT} = 1 + K_1\{[T]_t - 3[LT_2] + [L]_t - [WL] - 2[WLT] - [W_2L] - x\} \quad (S27)$$

$$x = [L]/(1 - K_m[L])^2 - [L] \quad (S28)$$

**[LT<sub>2</sub>]**

$$[LT_2] = \frac{-b_{LT_2} - \sqrt{b_{LT_2}^2 - 16K_2^2([T]_t - [WLT] - [T])([T]_t - [LT] - [WLT])}}{8K_2} \quad (S29)$$

where:

$$-b_{LT_2} = 1 + 4K_2\{[T]_t - [WLT] - 0.5[T] - 0.5[LT]\} \quad (S30)$$

**[WLT]**

$$[WLT] = \frac{-b_{WLT} - \sqrt{b_{WLT}^2 - 4K_{1w}^2([T]_t - 2[LT_2] - [T])([W]_t - [WL] - 2[W_2L])}}{2K_{1w}} \quad (S31)$$

where:

$$-b_{WLT} = 1 + K_{1w}\{[T]_t - 2[LT_2] - [T] + [W]_t - [WL] - 2[W_2L]\} \quad (S32)$$

**[WL]**

$$[WL] = \frac{-b_{WL} - \sqrt{b_{WL}^2 - 4K_{1wl}^2([W]_t - 2[W_2L] - [WLT])([L]_t - 2[W_2L] - x - [WLT] - [LT] - [LT_2])}}{2K_{1wl}} \quad (S33)$$

where:

$$-b_{WL} = 1 + K_{1wl}\{[W]_t - 3[W_2L] - 2[WLT] + [L]_t - x - [LT] - [LT_2]\} \quad (S34)$$

$$x = [L]/(1 - K_m[L])^2 - [L] \quad (\text{S28})$$

**[W<sub>2</sub>L]**

$$[W_2L] = \frac{-b_{W_2L} - \sqrt{b_{W_2L}^2 - 16K_{2wl}^2([W]_t - [W] - [WLT])([W]_t - [WL] - [WLT])}}{8K_{2wl}} \quad (\text{S35})$$

where:

$$-b_{W_2L} = 1 + 4K_{2wl}\{[W]_t - 0.5[W] - [WLT] - 0.5[WL]\} \quad (\text{S36})$$

## 2. Competitive Binding Data

**Table S1** Association constants and limiting complexation-induced chemical shift changes for the competitive association of 5-substituted tryptophan derivatives (**1a-h**) with DMPC (**2**)<sup>a</sup>

| R                             | $K_1 / \text{M}^{-1}$ | $\Delta\delta_1 / \text{ppm}$ | $K_{1'} / \text{M}^{-1}$ | $\Delta\delta_{1'} / \text{ppm}$ | $K_2 / \text{M}^{-1}$ | $\Delta\delta_2 / \text{ppm}$ | $K_{1w} / \text{M}^{-1}$ |
|-------------------------------|-----------------------|-------------------------------|--------------------------|----------------------------------|-----------------------|-------------------------------|--------------------------|
| OMe ( <b>1a</b> )             | $73 \pm 7$            | 5.37                          | $86 \pm 8$               | 5.67                             | $232 \pm 23$          | -0.11                         | $35 \pm 3$               |
| Me ( <b>1b</b> )              | $66 \pm 7$            | 5.27                          | $71 \pm 7$               | 5.25                             | $123 \pm 12$          | 0.07                          | $32 \pm 3$               |
| H ( <b>1c</b> )               | $60 \pm 6$            | 4.23                          | $76 \pm 8$               | 4.80                             | $48 \pm 5$            | 0.76                          | $38 \pm 4$               |
| F ( <b>1d</b> )               | $99 \pm 10$           | 5.37                          | $107 \pm 11$             | 5.02                             | $64 \pm 6$            | 0.49                          | $32 \pm 4$               |
| Cl ( <b>1e</b> )              | $188 \pm 19$          | 4.61                          | $175 \pm 17$             | 4.58                             | $85 \pm 8$            | 2.26                          | $28 \pm 3$               |
| Br ( <b>1f</b> )              | $182 \pm 18$          | 4.53                          | $162 \pm 16$             | 4.55                             | $90 \pm 9$            | 0.96                          | $27 \pm 3$               |
| I ( <b>1g</b> )               | $196 \pm 20$          | 4.83                          | $204 \pm 20$             | 4.54                             | $84 \pm 8$            | 1.36                          | $31 \pm 3$               |
| NO <sub>2</sub> ( <b>1h</b> ) | $306 \pm 43$          | 4.66                          | $248 \pm 40$             | 5.18                             | $475 \pm 47$          | 3.66                          | $25 \pm 2$               |

<sup>a</sup> Experiments were conducted in CDCl<sub>3</sub> at 20 °C. Association constants and limiting complexation-induced chemical shift changes ( $\Delta\delta_1 = \delta_1 - \delta_f$ ;  $\Delta\delta_2 = \delta_2 - \delta_f$ ;  $\Delta\delta_{1'} = \delta_{1'} - \delta_f$ ) were calculated using non-linear least squares fitting of eqs S19-S36 to the experimental data assuming a competitive binding model (*i.e.*  $K_{1w} \neq K_{1w}$  and  $K_1 \neq K_{1'}$  was permitted). Each value is the mean of duplicate experiments. Standard errors in  $\Delta\delta$  are  $\pm 10\%$ . Errors in  $K$  are  $\pm 10\%$  or the value calculated by curve fitting if the latter was greater than the former.

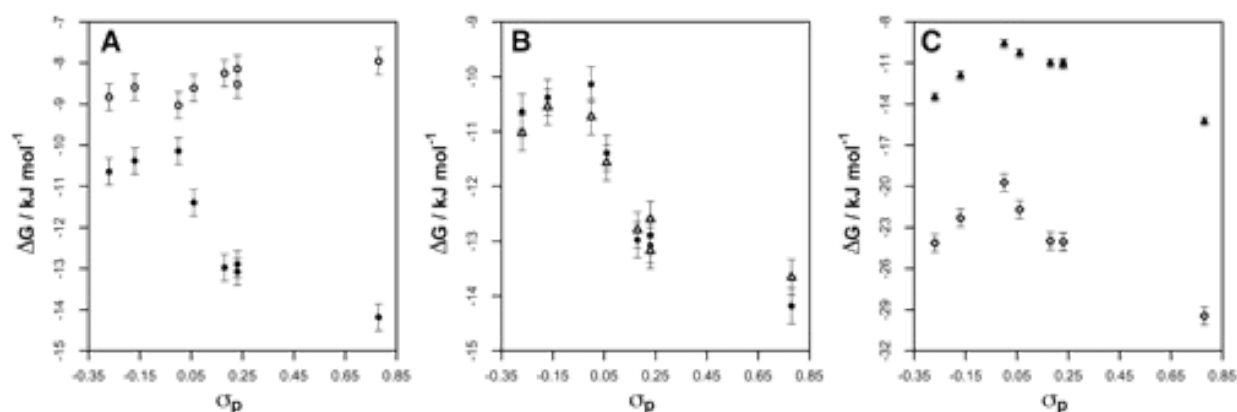

**Figure S1** Free energy trends for the association of 5-substituted tryptophan derivatives (**1a-h**) with DMPC (**2**) in CDCl<sub>3</sub> at 20 °C as a function of the *p*-Hammett parameter ( $\sigma_p$ ) of the 5-substituent. (A)  $\Delta G_1$  (●) and  $\Delta G_{1w}$  (○). (B)  $\Delta G_1$  (●) and  $\Delta G_{1'}$  (△). (C)  $\Delta G_2$  (▲) and  $\Delta G_1 + \Delta G_2$  (◇). The points are calculated from the data presented in Table S1.

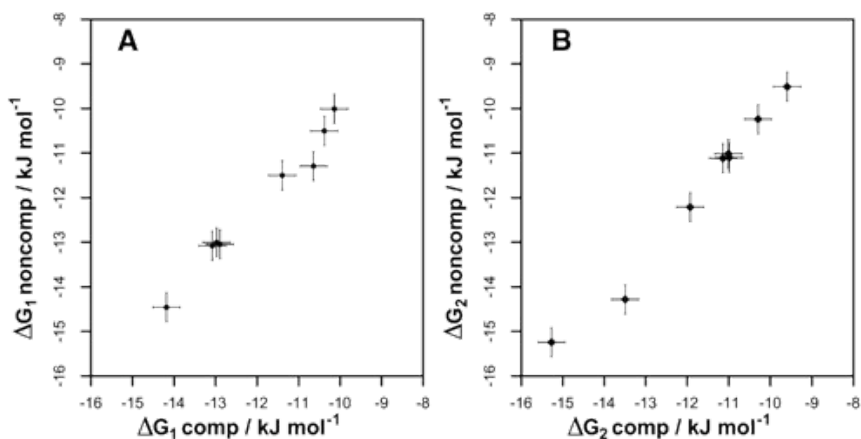

**Figure S2** Correlations between values for  $\Delta G_1$  (A) and  $\Delta G_2$  (B) obtained from competitive and non-competitive binding models to fit the experimental data.

### 3. Chemical Shift Changes for the Indole NH

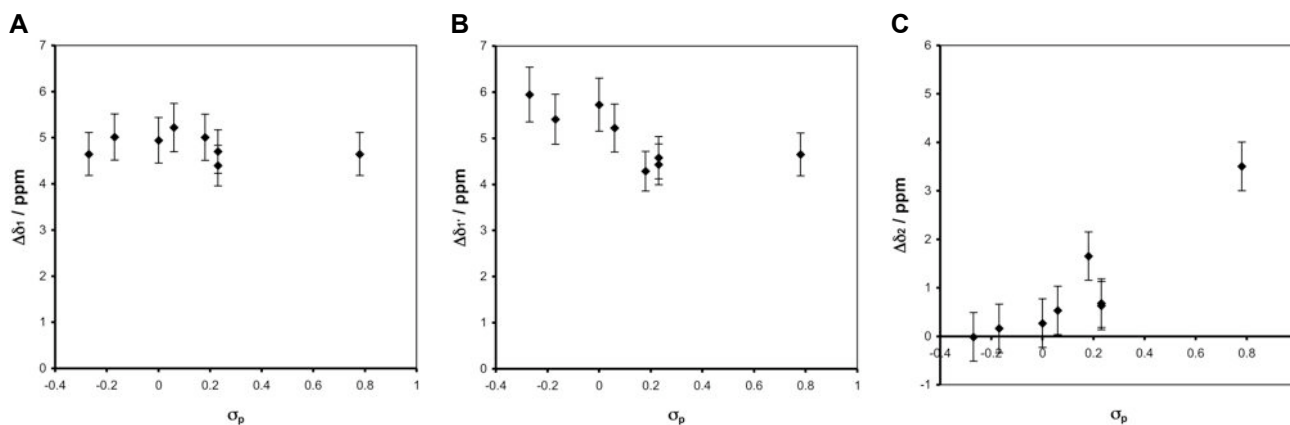

**Figure S3** Complexation-induced chemical shift changes for the indole-NH using a non-competitive binding model ( $K_{1w} = K_{1w'}$  and  $K_1 = K_1'$  enforced). (A)  $\Delta\delta_r$ . (B)  $\Delta\delta_{r'}$ . (C)  $\Delta\delta_z$ . Errors in  $\Delta\delta_r$  and  $\Delta\delta_{r'}$  are  $\pm 10\%$ . Errors in  $\Delta\delta_z$  are estimated at  $\pm 0.5$ .

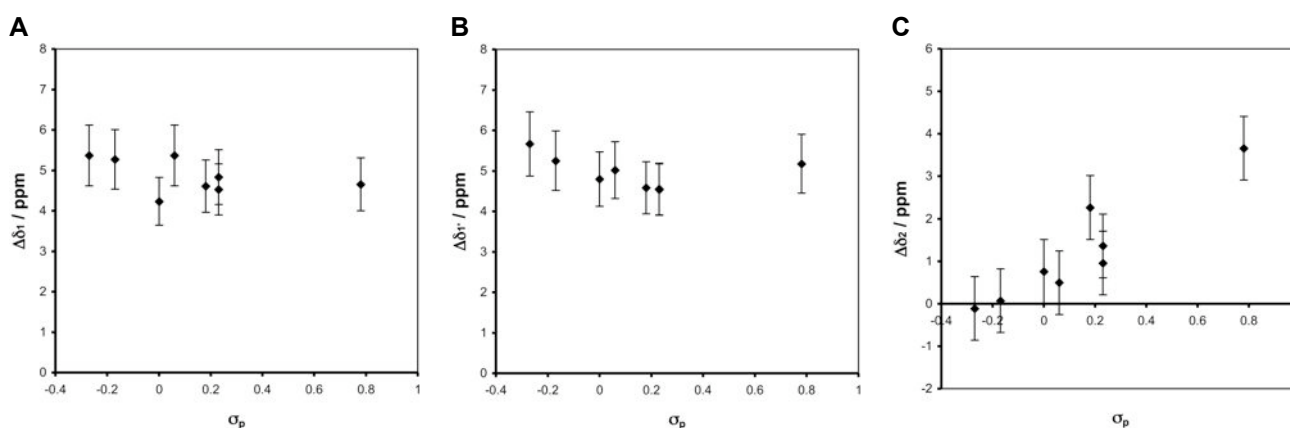

**Figure S4** Complexation-induced chemical shift changes for the indole-NH using a competitive binding model ( $K_{1w} \neq K_{1w'}$  and  $K_1 \neq K_1'$  permitted). (A)  $\Delta\delta_r$ . (B)  $\Delta\delta_{r'}$ . (C)  $\Delta\delta_z$ . Errors in  $\Delta\delta_r$  and  $\Delta\delta_{r'}$  are  $\pm 10\%$ . Errors in  $\Delta\delta_z$  are estimated at  $\pm 0.5$ .



#### 4. Correlations with Resonance and Inductive Components of Hammett Parameter

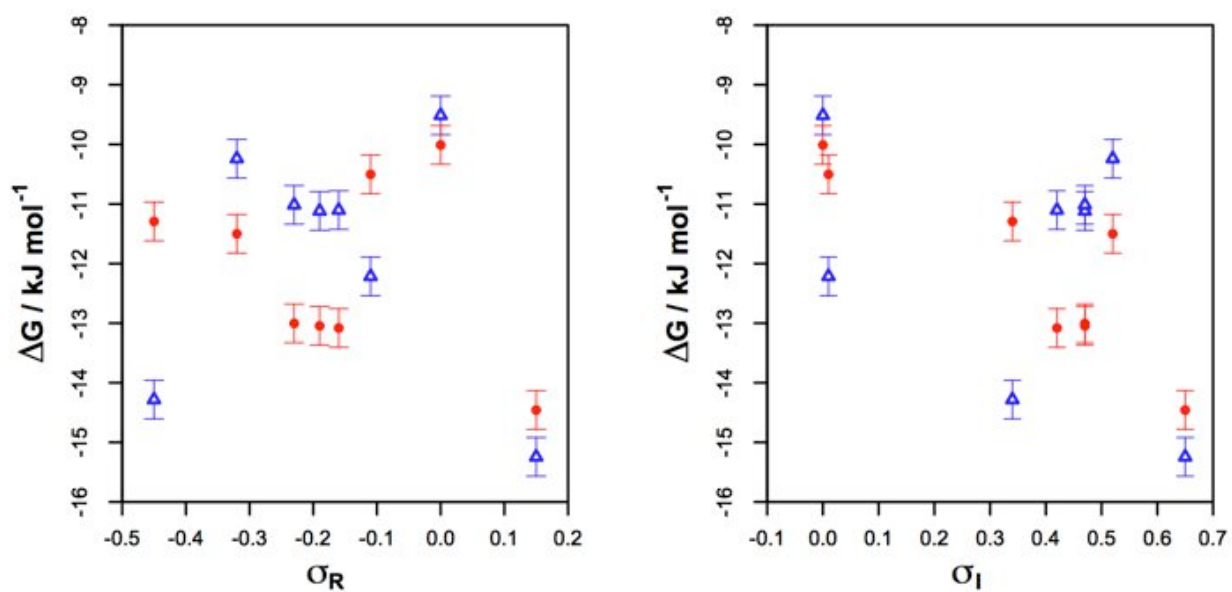

**Figure S5** Free energy trends for the association of 5-substituted *L*-tryptophan derivatives (**1a-h**) with DMPC (**2**) in  $\text{CDCl}_3$  at 20 °C as a function of the resonance ( $\sigma_R$ ) and inductive ( $\sigma_I$ ) components of the  $\rho$ -Hammett substituent parameter ( $\sigma_p$ ) of the 5-substituent. The points are calculated from the data presented in Table 1 of the main paper, which assume non-competitive binding of **1a-h** and water to **2**, with  $\Delta G_1$  represented as red points (●) and  $\Delta G_2$  as open blue triangles (△).

## 5. Dynamics Trajectories

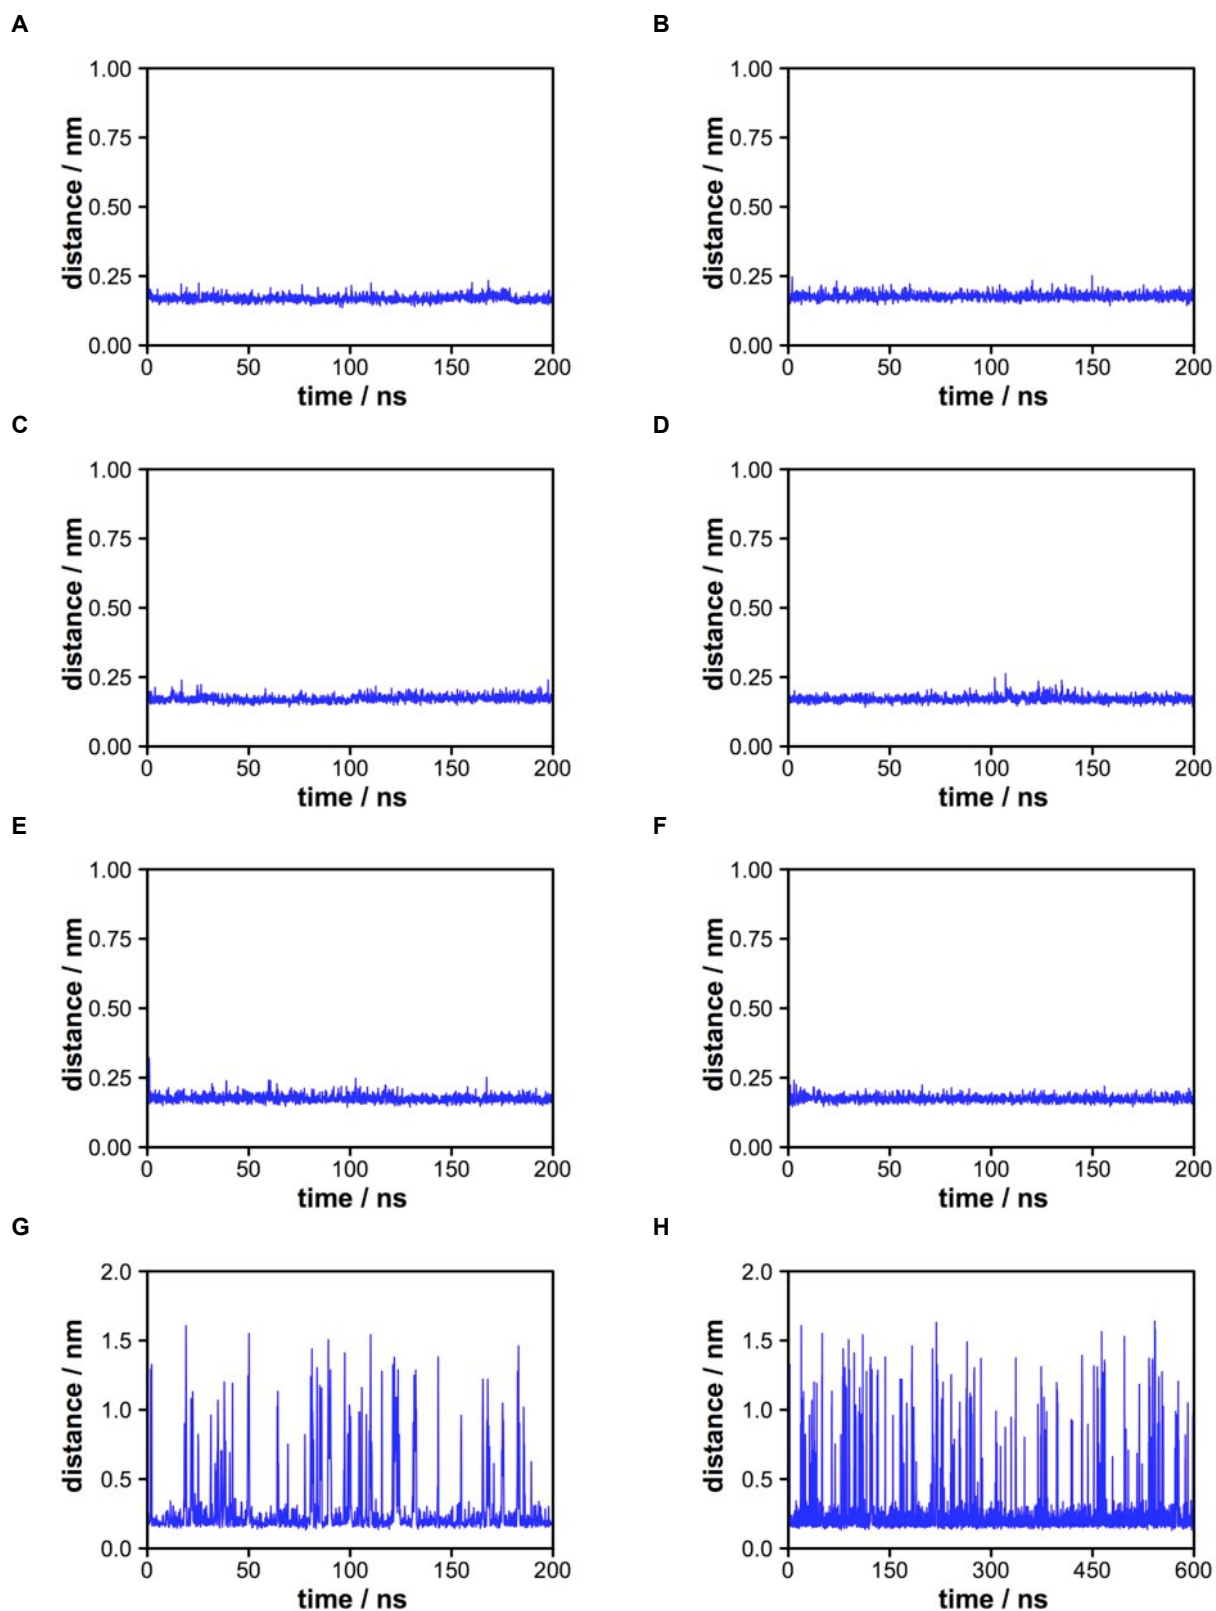

**Figure S6** Molecular dynamics trajectories for simulation of tryptophan **1c** and DMPC **2** in  $\text{CHCl}_3$ . (A)-(F) correspond to six different starting configurations for  $NpT$  simulations at 300 K; (G) shows the first 200 ns of a 600 ns  $NVT$  simulation at 600 K; (H) shows the full trajectory corresponding to (G).

## 6. Torsional Distributions

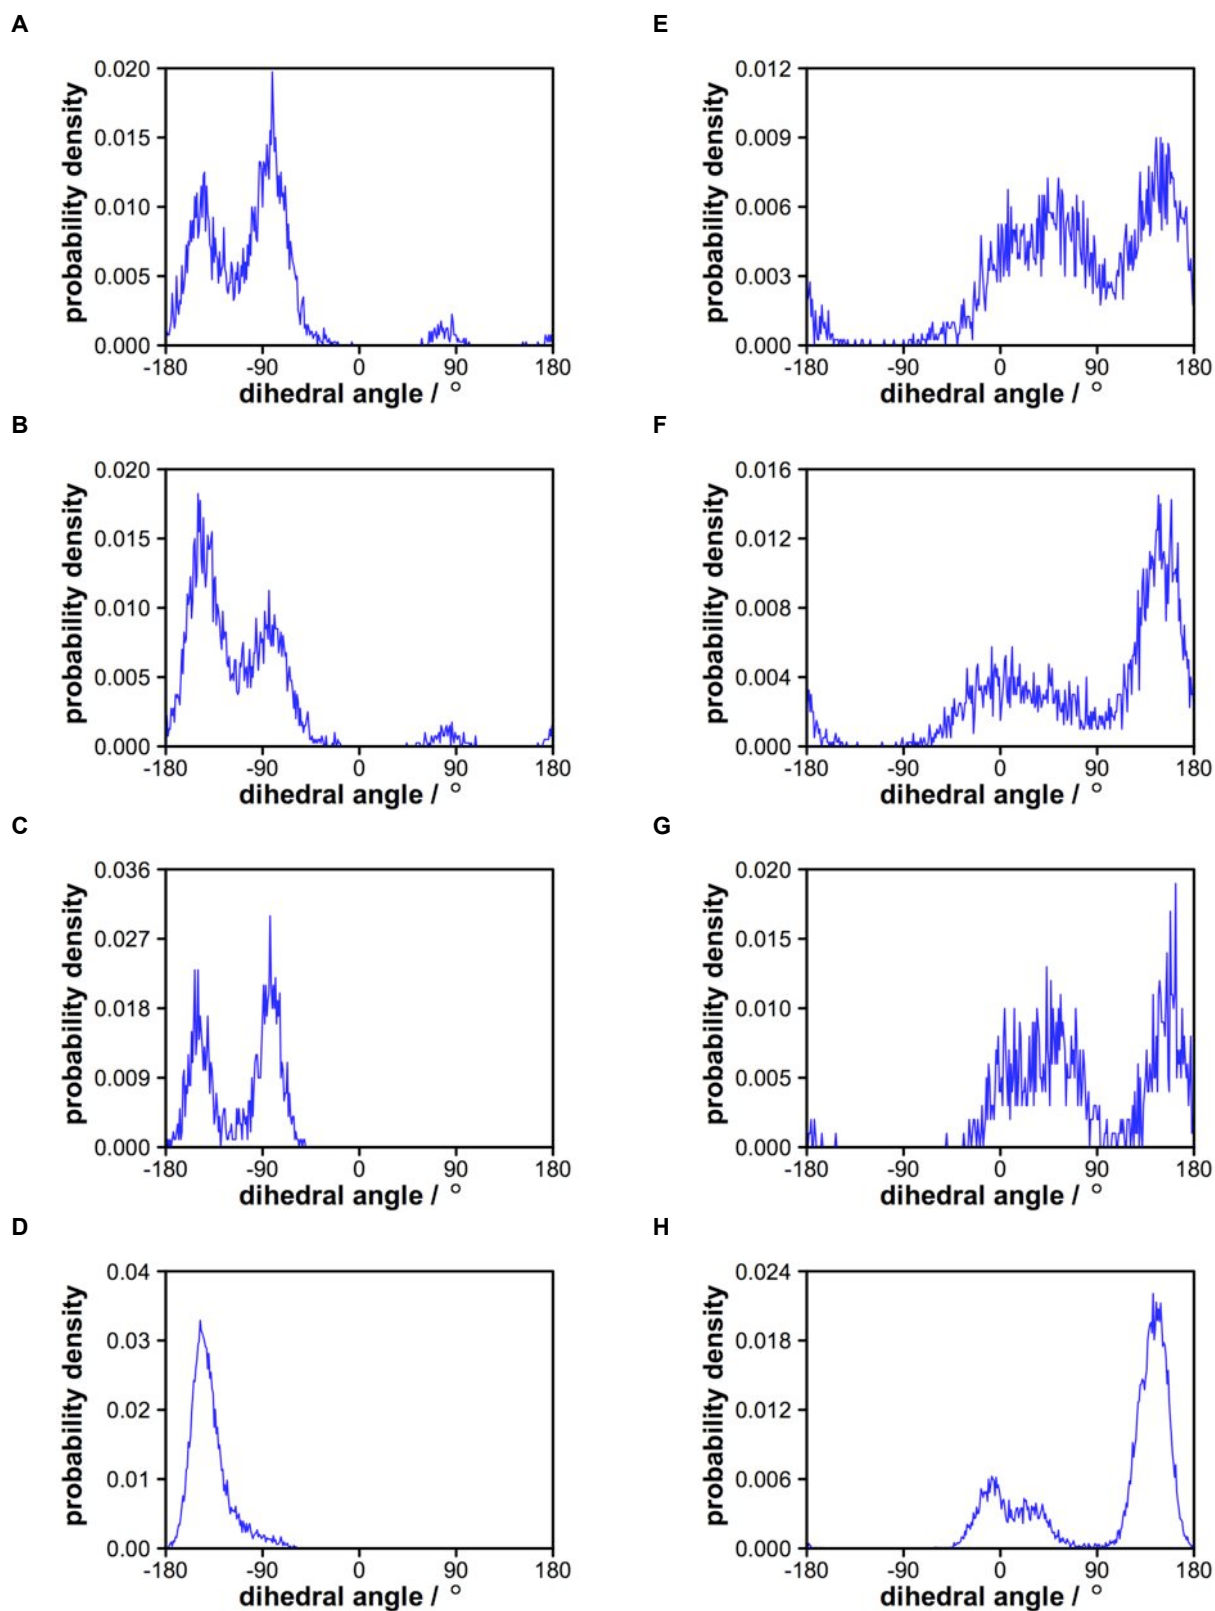

**Figure S7** Torsional distributions for selected dihedrals of tryptophan **1c**. (A)  $\phi$  from an *NVT* simulation of **1c** in  $\text{CHCl}_3$  at 600 K; (B)  $\phi$  from an *NVT* simulation of **1c** and DMPC **2** in  $\text{CHCl}_3$  at 600 K; (C)  $\phi$  from an *NpT* simulation of **1c** in  $\text{CHCl}_3$  at 300 K; (D)  $\phi$  from an *NpT* simulation of **1c** and DMPC **2** in  $\text{CHCl}_3$  at 300 K; (E)-(H) are the corresponding distributions for  $\psi$ .

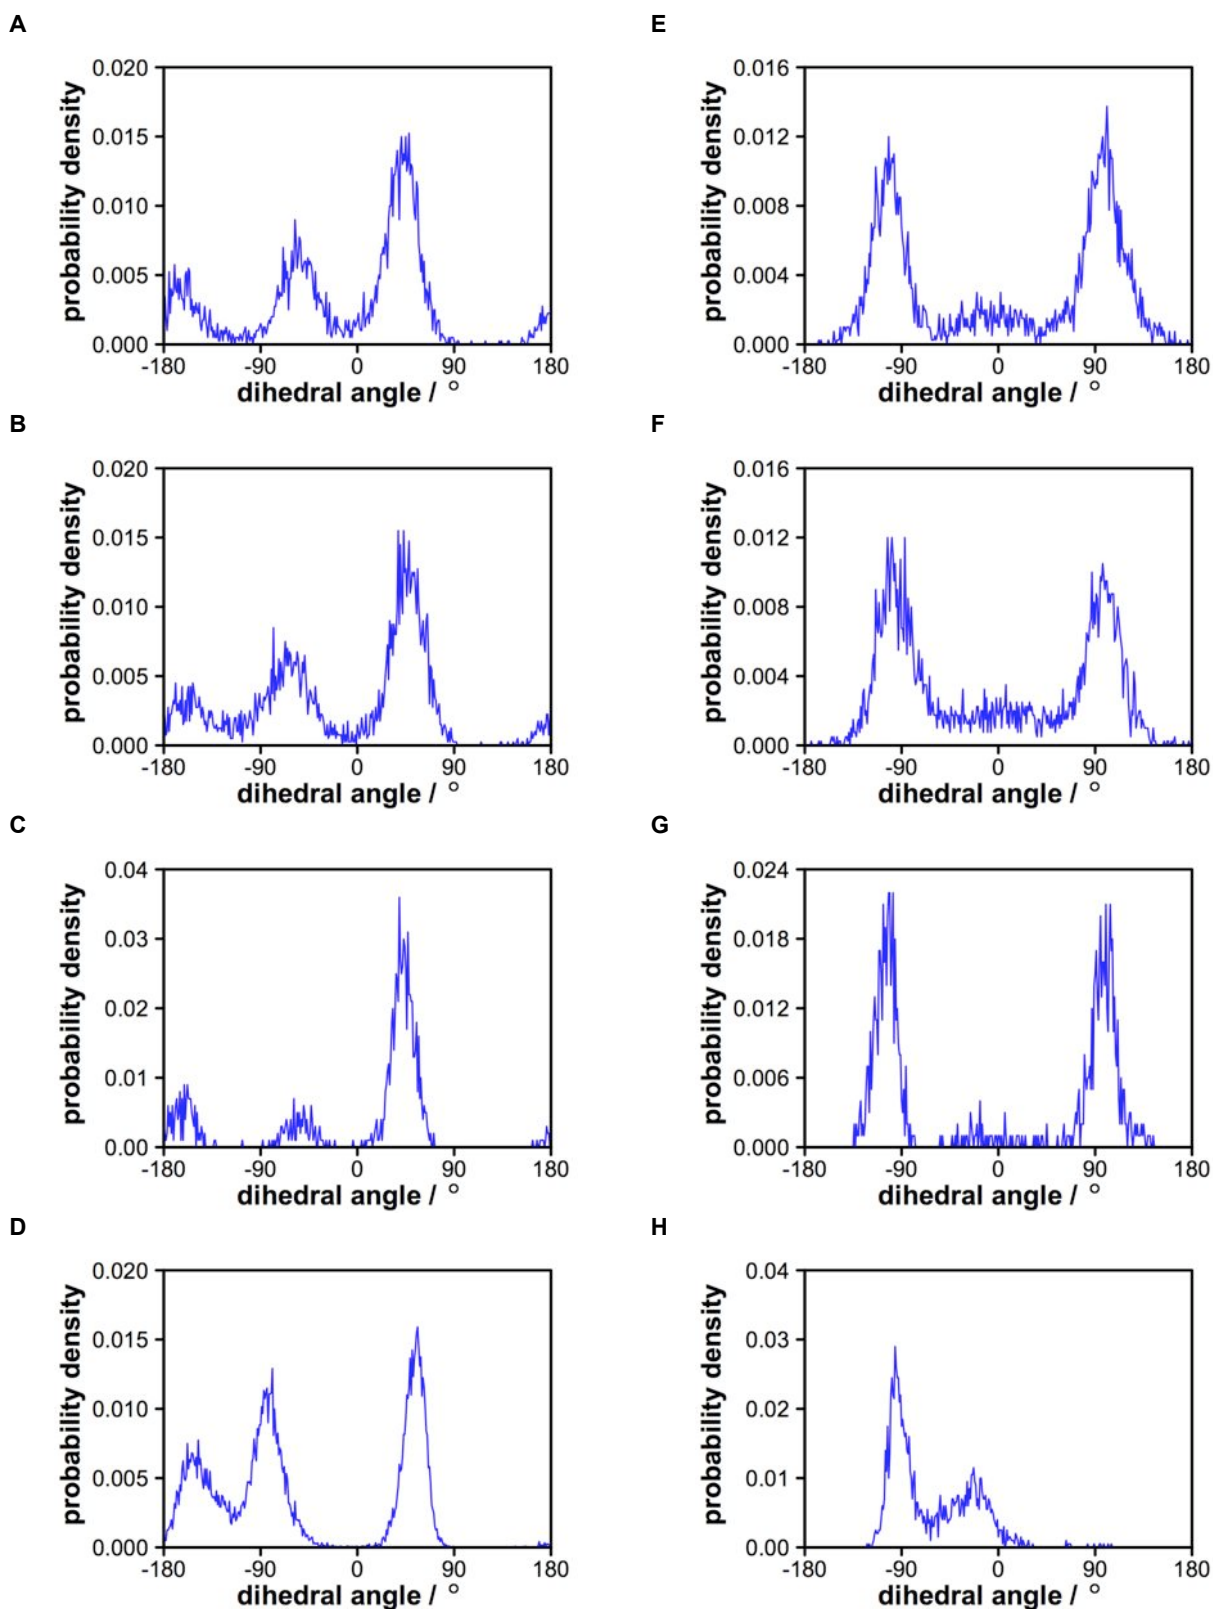

**Figure S8** Torsional distributions for selected dihedrals of tryptophan **1c**. (A)  $\chi_1$  ( $\chi_1$ ) from an *NVT* simulation of **1c** in  $\text{CHCl}_3$  at 600 K; (B)  $\chi_1$  from an *NVT* simulation of **1c** and DMPC **2** in  $\text{CHCl}_3$  at 600 K; (C)  $\chi_1$  from an *NpT* simulation of **1c** in  $\text{CHCl}_3$  at 300 K; (D)  $\chi_1$  from an *NpT* simulation of **1c** and DMPC **2** in  $\text{CHCl}_3$  at 300 K; (E)-(H) are the corresponding distributions for  $\chi_2$  ( $\chi_2$ ).

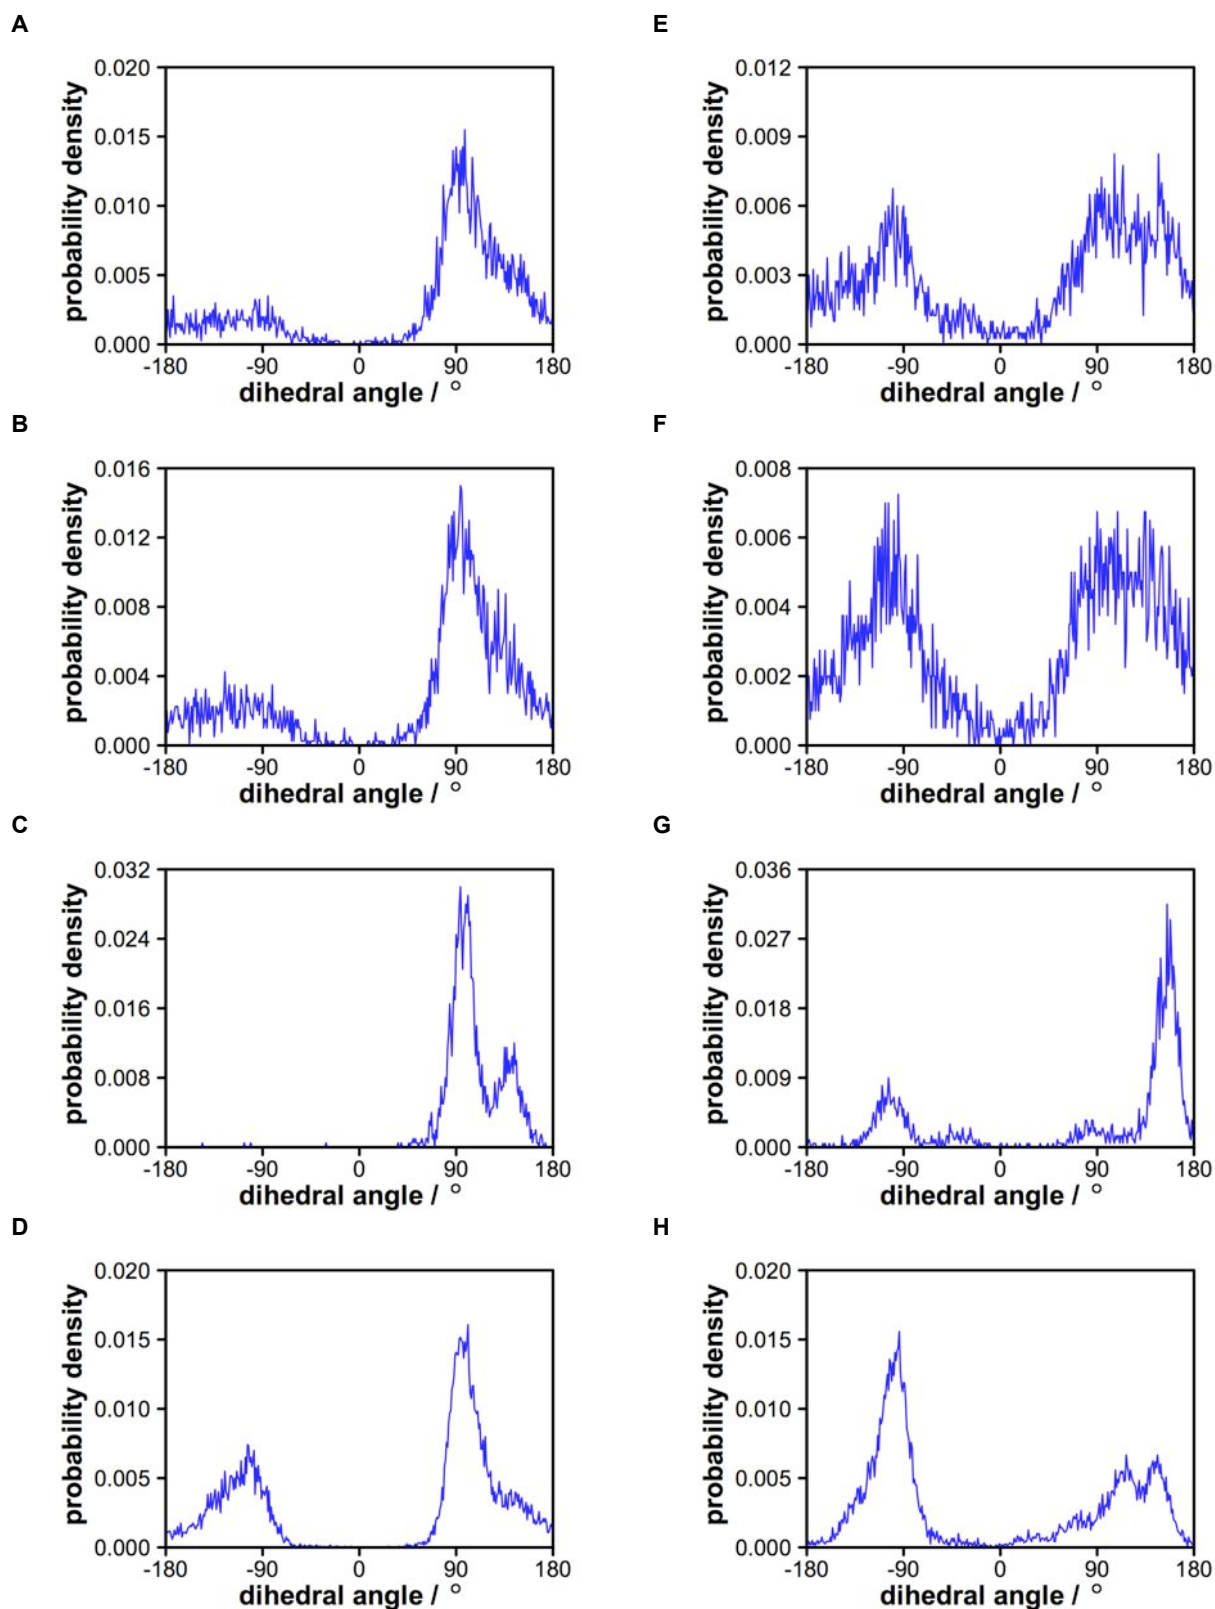

**Figure S9** Torsional distributions for selected dihedrals of DMPC **2**. (A)  $\alpha_2$  from an *NVT* simulation of **2** in  $\text{CHCl}_3$  at 600 K; (B)  $\alpha_2$  from an *NVT* simulation of **1c** and DMPC **2** in  $\text{CHCl}_3$  at 600 K; (C)  $\alpha_2$  from an *NpT* simulation of **2** in  $\text{CHCl}_3$  at 300 K; (D)  $\alpha_2$  from an *NpT* simulation of **1c** and DMPC **2** in  $\text{CHCl}_3$  at 300 K; (E)-(H) are the corresponding distributions for  $\alpha_3$ . { $\alpha_2$  and  $\alpha_3$  are defined as in Marsh, D, *Protein Sci.*, **2003**, 12, 2109;  $\alpha_2$  = atoms 12-11-8-7,  $\alpha_3$  = atoms 11-8-7-6, Fig. 1}.

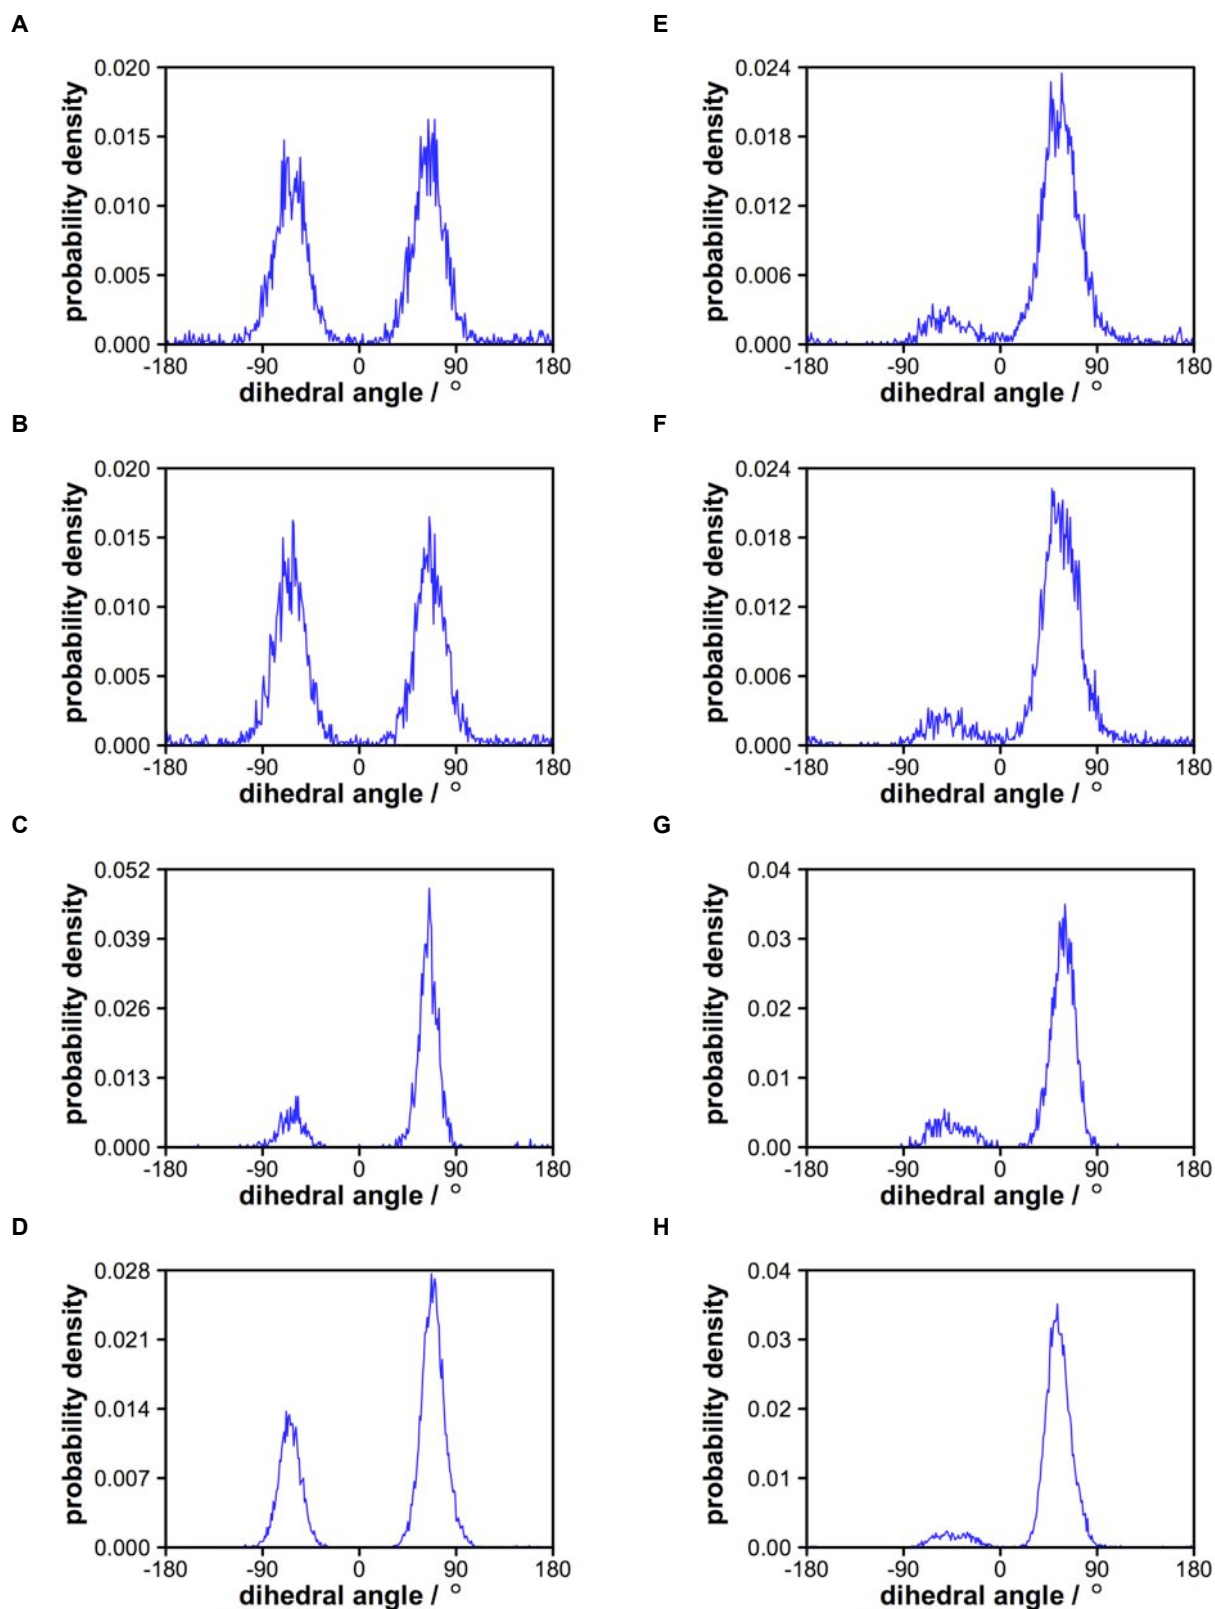

**Figure S10** Torsional distributions for selected dihedrals of DMPC **2**. (A)  $\alpha_5$  from an *NVT* simulation of **2** in  $\text{CHCl}_3$  at 600 K; (B)  $\alpha_5$  from an *NVT* simulation of **1c** and DMPC **2** in  $\text{CHCl}_3$  at 600 K; (C)  $\alpha_5$  from an *NpT* simulation of **2** in  $\text{CHCl}_3$  at 300 K; (D)  $\alpha_5$  from an *NpT* simulation of **1c** and DMPC **2** in  $\text{CHCl}_3$  at 300 K; (E)-(H) are the corresponding distributions for  $\theta_4$ . ( $\alpha_5$  and  $\theta_4$  are defined as in Marsh, D, *Protein Sci.*, **2003**, *12*, 2109;  $\alpha_5$  = atoms 7-6-5-4,  $\theta_4$  = atoms 18-17-13-14, Fig. 1).

## 7. Radial Distribution Functions

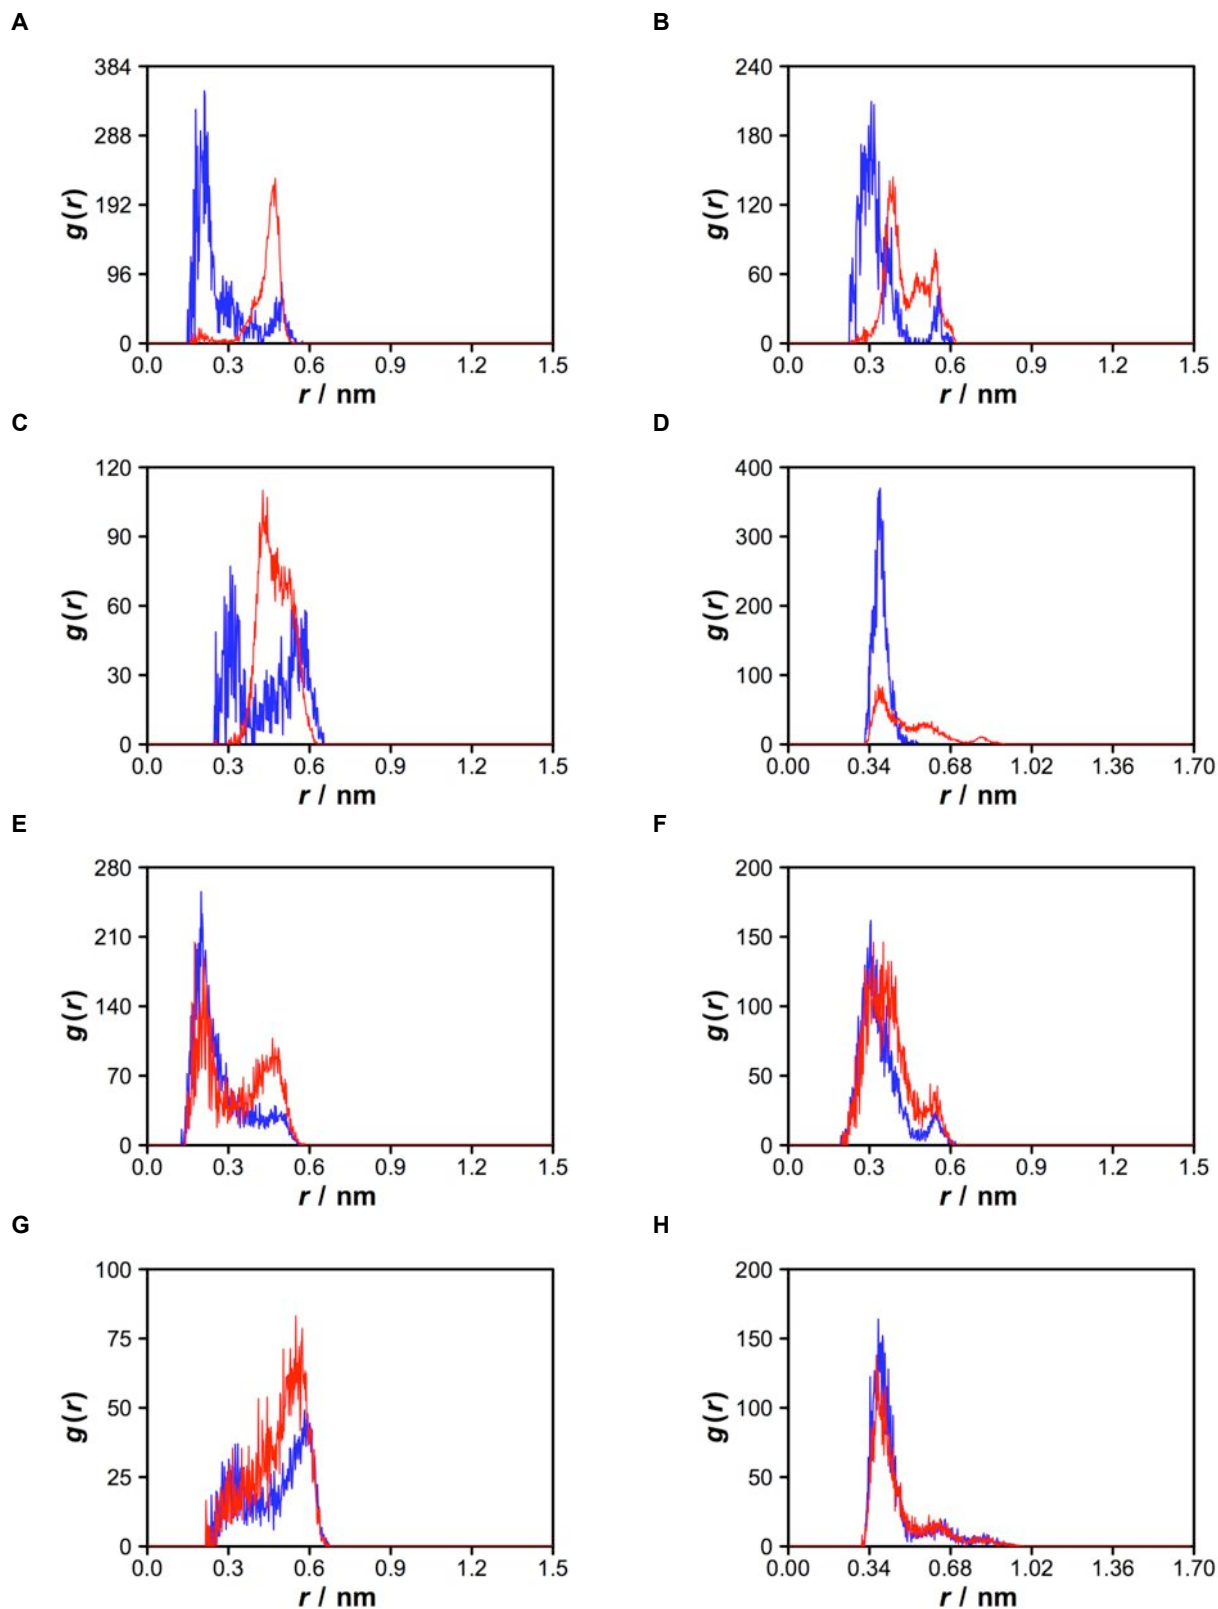

**Figure S11** Radial distribution functions for groups of atoms from simulations in  $\text{CHCl}_3$ . (A) 78-52; (B) 54-(59,60,61,62,63); (C) 78-(59,60,61,62,63); (D) 16-(1,2,3,5). (A)-(D) are from  $NpT$  simulations at 300 K and correspond to Fig. 6 (A)-(D) in the main paper. Data from simulations of **1c** and **2** together are shown in red; data from corresponding simulations of individual molecules of **1c** are shown in blue. (E)-(H) are the corresponding plots for  $NVT$  simulations at 600 K.



## 8. Clustered Structures

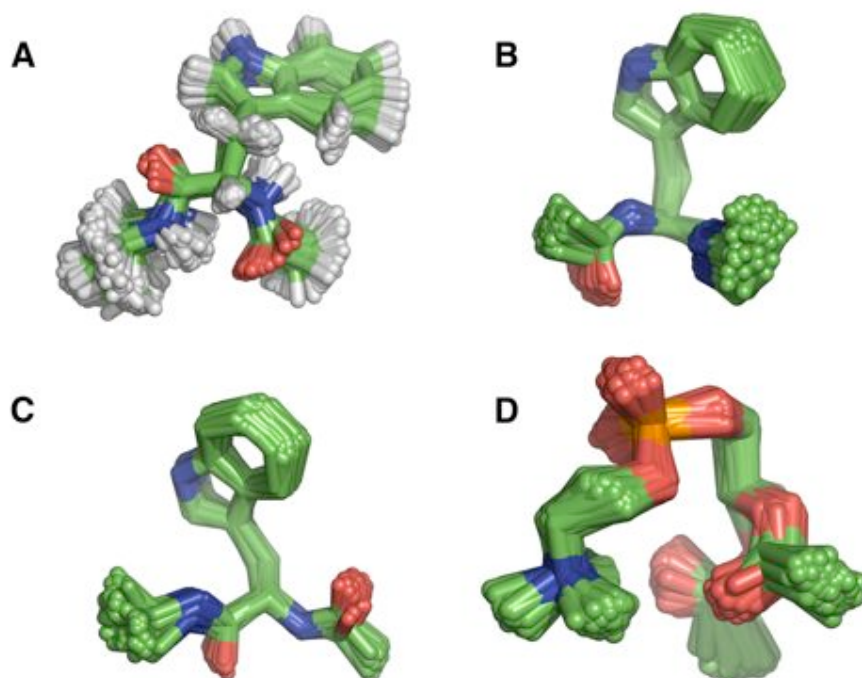

**Figure S12** The most abundant conformations of N-acetyl tryptophan N-ethyl amide (**1c**) and DMPC (**2**) from constant- $NpT$  simulations of single molecules of each in a chloroform box at 300 K. A, tryptophan derivative **1c** (153 structures); B, **1c** (107); C, **1c** (89 structures); D, DMPC (**2**, 308 structures). Some atoms of the acyl chains have been omitted for clarity.

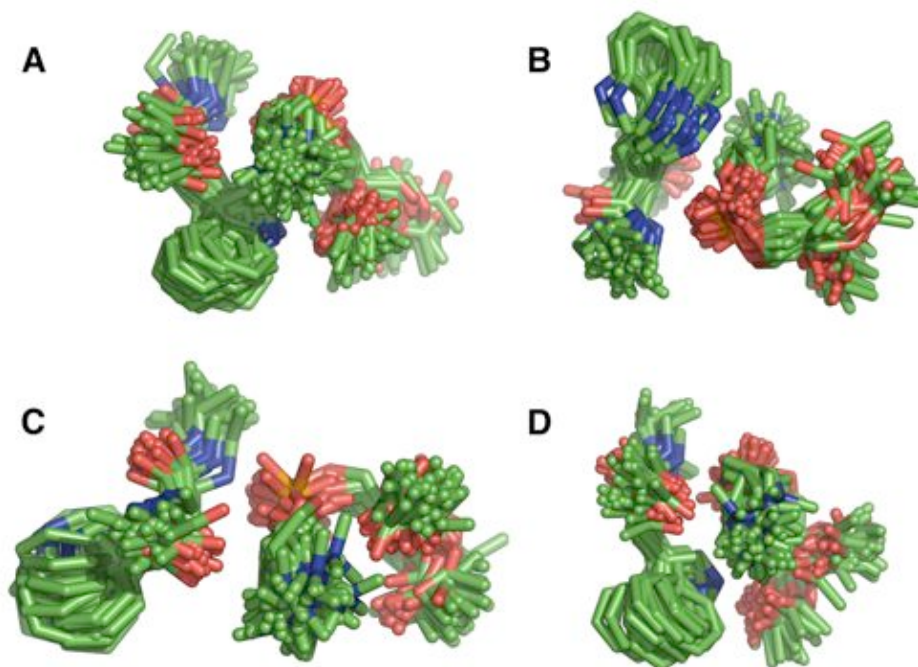

**Figure S13** The four most abundant binding interactions from cluster analysis of all of the structures from a 600 ns  $NVT$  simulation of tryptophan derivative **1c** and DMPC (**2**) in a chloroform box at 600 K.



## 9. 1:2 Lipid:Tryptophan Simulation Data

**Table S2.** Analysis of binding interactions during *NVT* simulations of 2 molecules of tryptophan derivative **1c** and DMPC (**2**) in chloroform at 600 K: tryptophan\_1

| Entry | Interacting Pair <sup>a</sup> | Cutoff / nm <sup>b</sup> | % time $\leq$ cut-off | % time as sole interaction <sup>c</sup> |
|-------|-------------------------------|--------------------------|-----------------------|-----------------------------------------|
| 1     | 20-19                         | 0.35                     | 2 $\pm$ 1             | -                                       |
| 2     | 20-16                         | 0.35                     | 2 $\pm$ 2             | -                                       |
| 3     | 20-(7,9,10,11)                | 0.435                    | 16 $\pm$ 6            | 4                                       |
| 4     | 22-19                         | 0.35                     | 2 $\pm$ 2             | -                                       |
| 5     | 22-16                         | 0.35                     | 5 $\pm$ 2             | -                                       |
| 6     | 22-(7,9,10,11)                | 0.495                    | 36 $\pm$ 8            | 4                                       |
| 7     | 24-19                         | 0.35                     | 5 $\pm$ 3             | 6                                       |
| 8     | 24-16                         | 0.35                     | 9 $\pm$ 4             | 8                                       |
| 9     | 24-(7,9,10,11)                | 0.385                    | 14 $\pm$ 3            | 22                                      |
| 10    | 4-(Ar)                        | 0.737                    | 34 $\pm$ 7            | 1                                       |
| 11    | 4-(Py)                        | 0.665                    | 35 $\pm$ 8            | <1                                      |
| 12    | 21-(1,2,3,5)                  | 0.613                    | 38 $\pm$ 11           | 10                                      |
| 13    | 23-(1,2,3,5)                  | 0.539                    | 18 $\pm$ 6            | 11                                      |

<sup>a</sup> atom numbers correspond to those in Figure 1. The centre of mass of the atoms grouped in parentheses was used for calculations.

<sup>b</sup> cutoff set to 0.35 nm for hydrogen bonding interactions, or determined from point of zero gradient in the radial distribution function of the corresponding interaction.

<sup>c</sup> the proportion of the time spent at a distance less than the cut-off during which this was the only intermolecular interaction.

**Table S3.** Analysis of binding interactions during *NVT* simulations of 2 molecules of tryptophan derivative **1c** and DMPC (**2**) in chloroform at 600 K: tryptophan\_2

| Entry | Interacting Pair <sup>a</sup> | Cutoff / nm <sup>b</sup> | % time $\leq$ cut-off | % time as sole interaction <sup>c</sup> |
|-------|-------------------------------|--------------------------|-----------------------|-----------------------------------------|
| 1     | 20-19                         | 0.35                     | 2 $\pm$ 2             | -                                       |
| 2     | 20-16                         | 0.35                     | 2 $\pm$ 2             | -                                       |
| 3     | 20-(7,9,10,11)                | 0.413                    | 14 $\pm$ 6            | 2                                       |
| 4     | 22-19                         | 0.35                     | 2 $\pm$ 1             | -                                       |
| 5     | 22-16                         | 0.35                     | 5 $\pm$ 3             | -                                       |
| 6     | 22-(7,9,10,11)                | 0.503                    | 38 $\pm$ 11           | 5                                       |
| 7     | 24-19                         | 0.35                     | 5 $\pm$ 3             | 4                                       |
| 8     | 24-16                         | 0.35                     | 9 $\pm$ 4             | 9                                       |
| 9     | 24-(7,9,10,11)                | 0.387                    | 14 $\pm$ 4            | 20                                      |
| 10    | 4-(Ar)                        | 0.765                    | 37 $\pm$ 8            | 1                                       |
| 11    | 4-(Py)                        | 0.693                    | 39 $\pm$ 10           | <0.1                                    |
| 12    | 21-(1,2,3,5)                  | 0.585                    | 39 $\pm$ 8            | 7                                       |
| 13    | 23-(1,2,3,5)                  | 0.581                    | 19 $\pm$ 7            | 10                                      |

<sup>a</sup> atom numbers correspond to those in Figure 1. The centre of mass of the atoms grouped in parentheses was used for calculations.

<sup>b</sup> cutoff set to 0.35 nm for hydrogen bonding interactions, or determined from point of zero gradient in the radial distribution function of the corresponding interaction.

<sup>c</sup> the proportion of the time spent at a distance less than the cut-off during which this was the only intermolecular interaction.

## 10. 1:2 Lipid:Tryptophan Simulation - Clustering

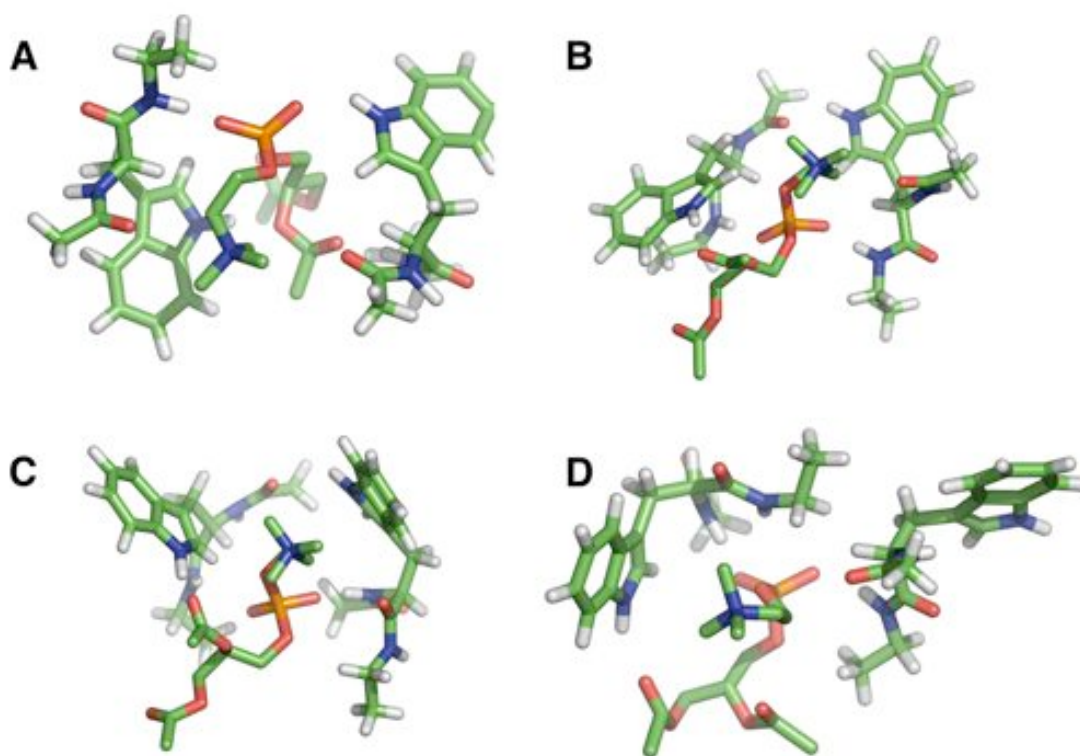

**Figure S14** The four most abundant binding interactions from cluster analysis of all of the structures from a 600 ns *NVT* simulation of 2 molecules of tryptophan derivative **1c** and DMPC (**2**) in a chloroform box at 600 K. The median structure is shown in each case. The numbers of structures per cluster are 9, 8, 7 and 6 for a), b), c) and d) respectively.
